# Supplementary material for: Angiogenin Secretion From Hepatoma Cells Activates Hepatic Stellate Cells To Amplify A Self-Sustained Cycle Promoting Liver Cancer
Source: PubMed Central journal article supplement — Sci Rep. 2015 Jan 21;5:7916. doi: 10.1038/srep07916 (PMC4300499; doi:10.1038/srep07916), 2015-01-21
Supplement: srep07916-s1.pdf [file srep07916-s1.pdf]

**ANGIOGENIN SECRETION FROM HEPATOMA CELLS ACTIVATES  
HEPATIC STELLATE CELLS TO AMPLIFY A SELF-SUSTAINED CYCLE  
PROMOTING LIVER CANCER**

**Cristina Bárcena<sup>a</sup>, Milica Stefanovic<sup>a</sup>, Anna Tutusaus<sup>a</sup>, Guillermo A. Martinez-  
Nieto<sup>a</sup>, Laura Martinez<sup>a</sup>, Carmen García-Ruiz<sup>a,b</sup>, Alvaro de Mingo<sup>a</sup>, Juan  
Caballeria<sup>b</sup>, José C Fernandez-Checa<sup>#a,b,c</sup>, Montserrat Mari<sup>#a,b</sup>, Albert Morales<sup>#a,b</sup>**

<sup>a</sup>Department of Cell Death and Proliferation, IIBB-CSIC, IDIBAPS, Barcelona, Spain.

<sup>b</sup>Liver Unit-Hospital Clínic, CIBERehd. Barcelona, Spain.

<sup>c</sup>Research Center for ALPD and Cirrhosis, Keck School of Medicine of the  
University of Southern California, Los Angeles, CA, USA.

# Corresponding Authors: Albert Morales, [amorales@clinic.ub.es](mailto:amorales@clinic.ub.es), Montserrat Mari, [monmari@clinic.ub.es](mailto:monmari@clinic.ub.es) or José C. Fernandez-Checa [checa229@yahoo.com](mailto:checa229@yahoo.com). Full contact information: Address: Centre Esther Koplowitz, C/ Rosselló 149-153, 4<sup>th</sup> Floor. 08036-Barcelona, Spain (Phone# +34-93-2275400 Ext.4545; Fax# +34-93-3129405).

# Suppl. Fig. 1

**A**

|   | A     | B            | C             | D      | E      | F      | G      | H       |
|---|-------|--------------|---------------|--------|--------|--------|--------|---------|
| 1 | POS   | POS          | NEG           | NEG    | ANG    | EGF    | ENA-78 | bFGF    |
| 2 | POS   | POS          | NEG           | NEG    | ANG    | EGF    | ENA-78 | bFGF    |
| 3 | GRO   | IFN<br>gamma | IGF-1         | IL-6   | IL-8   | Leptin | MCP-1  | PDGF-BB |
| 4 | GRO   | IFN<br>gamma | IGF-1         | IL-6   | IL-8   | Leptin | MCP-1  | PDGF-BB |
| 5 | PLGF  | RANTES       | TGF<br>beta 1 | TIMP-1 | TIMP-2 | THPO   | VEGF   | VEGF-D  |
| 6 | PLGF  | RANTES       | TGF<br>beta 1 | TIMP-1 | TIMP-2 | THPO   | VEGF   | VEGF-D  |
| 7 | BLANK | BLANK        | BLANK         | BLANK  | BLANK  | BLANK  | NEG    | POS     |
| 8 | BLANK | BLANK        | BLANK         | BLANK  | BLANK  | BLANK  | NEG    | POS     |

**B**

|   | A     | B       | C       | D     | E             | F            | G     | H            |
|---|-------|---------|---------|-------|---------------|--------------|-------|--------------|
| 1 | POS   | POS     | NEG     | NEG   | ANGPT1        | ANGPT2       | PLG   | Endostatin   |
| 2 | POS   | POS     | NEG     | NEG   | ANGPT1        | ANGPT2       | PLG   | Endostatin   |
| 3 | G-CSF | GM-CSF  | I-309   | IL-10 | IL-1<br>alpha | IL-1<br>beta | IL-2  | IL-4         |
| 4 | G-CSF | GM-CSF  | I-309   | IL-10 | IL-1<br>alpha | IL-1<br>beta | IL-2  | IL-4         |
| 5 | I-TAC | MCP-3   | MCP-4   | MMP-1 | MMP-9         | PECAM-1      | TIE-2 | TNF<br>alpha |
| 6 | I-TAC | MCP-3   | MCP-4   | MMP-1 | MMP-9         | PECAM-1      | TIE-2 | TNF<br>alpha |
| 7 | uPAR  | VEGF R2 | VEGF R3 | BLANK | BLANK         | BLANK        | BLANK | POS          |
| 8 | uPAR  | VEGF R2 | VEGF R3 | BLANK | BLANK         | BLANK        | BLANK | POS          |

Antibody array composition: A) Angiogenin, EGF, ENA-78, bFGF, GRO, IFN-gamma, IGF-1, IL-6, IL-8, Leptin, MCP-1, PDGF-BB, PLGF, RANTES, TGF beta 1, TIMP-1, TIMP-2, Thrombopoietin, VEGF-A, VEGF-D. B) Angiopoietin 1, Angiopoietin 2, Angiostatin, Endostatin, G-CSF, GM-CSF, I-309, IL-10, IL-1 alpha, IL-1 beta, IL-2, IL-4, I-TAC, MCP-3, MCP-4, MMP-1, MMP-9, PECAM-1, Tie-2, TNF alpha, uPAR, VEGFR2, VEGFR3.

## Suppl. Fig. 2

|                    | Cirrhotic<br>Decompensated<br>(n=9) | Cirrhotic<br>Compensated<br>(n=7) | Alcoholic<br>(n=9) | Reference<br>values |
|--------------------|-------------------------------------|-----------------------------------|--------------------|---------------------|
| Age                | 51±2                                | 58±2                              | 48±4               | -                   |
| Billirubin (mg/dl) | 2.31±0.66 *                         | 1.46±0.56 *                       | 0.79±0.16          | 0.2 - 1.0           |
| Albumin (g/l)      | 32.3±2.6 *                          | 42.1±1.6                          | 44.4±0.6           | 35 - 50             |
| Quick (%)          | 61.6±8.0 *                          | 77.6±7.5                          | 97.7±1.8           | 70 - 100            |
| MELD               | 4.4±1.8                             | 10.4±1.6                          | 7.1±0.4            | 6                   |
| Creatinin (mg/dl)  | 0.97±0.10                           | 1.02±0.08                         | 0.83±0.06          | 0.6 - 1.2           |
| AST (U/l)          | 50±17 *                             | 29±3                              | 21±4               | 10 - 40             |
| ALT (U/l)          | 24±4                                | 25±2                              | 23±4               | 10 - 35             |
| GGT (U/l)          | 115±43 *                            | 58±15 *                           | 38±19              | 5 - 40              |

**Biochemical data from the patient's serums analyzed for angiogenin concentration.** Reference ranges for normal individuals are indicated for each parameter (right column) according to Hospital Clinic Core Lab (Barcelona, Spain).

## Suppl. Fig. 3

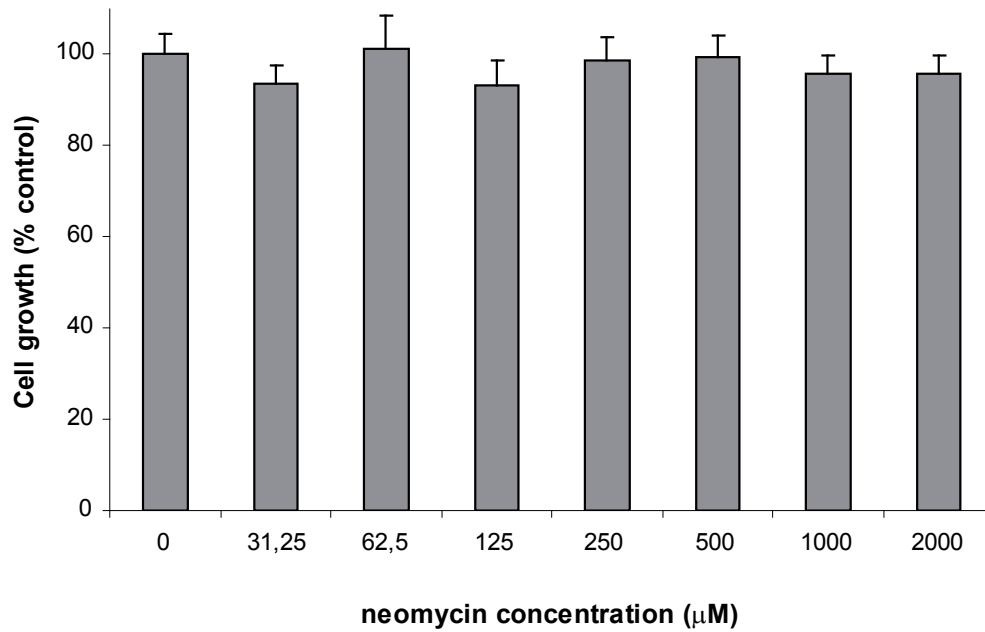

HepG2 cells were treated with neomycin at different doses (0 to 2 mM) for one week and cell growth was quantitated by MTT assay. No significant differences were found between groups.
